# Supplementary material
Source: MDPI journal article supplement (https://www.mdpi.com/2073-4441/15/8/1583)
Supplement: s1 [file s1]

## Article

# Removal of carbamazepine in aqueous solution by TiO<sub>2</sub> ceramic photo-catalyst under simulated solar light: Kinetics, effects of environmental factors and degradation pathways

Trinh Hoang Nghia<sup>1</sup>, Vu Toan Khanh<sup>1</sup>, Cam Tu Vu<sup>1</sup> , Nguyen Thi Kieu Oanh<sup>1</sup> , Nguyen Thi Van Anh<sup>a</sup> , Le Hong Luyen<sup>1</sup> , Nobuaki Negishi<sup>2</sup> , Sylvain Ouillon<sup>1,3</sup>  and Bui Van Hoi<sup>1,\*</sup> 

<sup>1</sup> Department of Water - Environment - Oceanography (WEO), University of Science and Technology of Hanoi (USTH), Vietnam Academy of Science and Technology (VAST), 18 Hoang Quoc Viet, Cau Giay, 122100, Hanoi, Vietnam; kingoffeeder@gmail.com; vutoankhanh99@gmail.com; vu-cam.tu@usth.edu.vn; nguyen-thi-kieu.oanh@usth.edu.vn; nguyen-thi-van.anh@usth.edu.vn; le-hong.luyen@usth.edu.vn

<sup>2</sup> Environmental Management Research Institute, National Institute of Advanced Industrial Science and Technology, 16-1 Onogawa, Tsukuba, 305- 8569, Japan; n-negishi@aist.go.jp

<sup>3</sup> UMR LEGOS, University of Toulouse, IRD, CNES, CNRS, UPS, 14 Avenue Edouard Belin, 31400 Toulouse, France; sylvain.ouillon@legos.obs-mip.fr

\* Correspondence: bui-van.hoi@usth.edu.vn Tel: +84 982 975 883

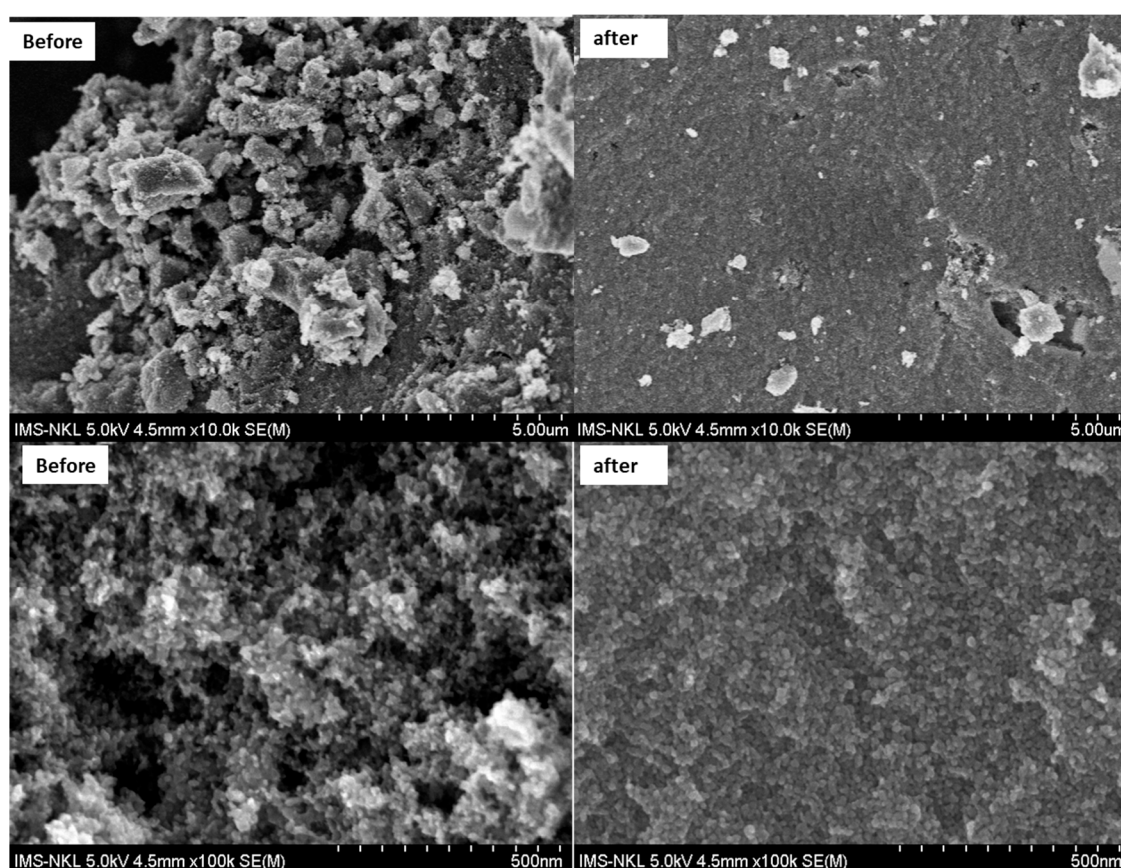

Figure S1. SEM image of PFS-01 before and after experiments

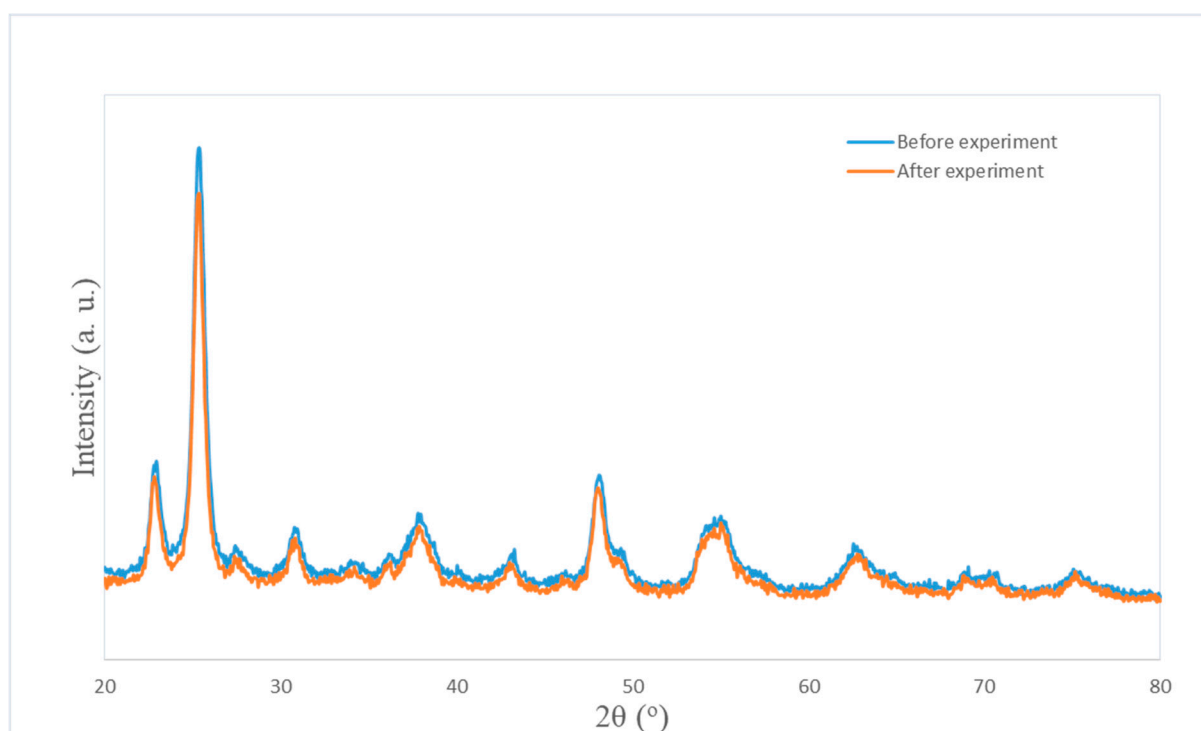

Figure S2: XRD analysis of PFS-01 before and after experiments

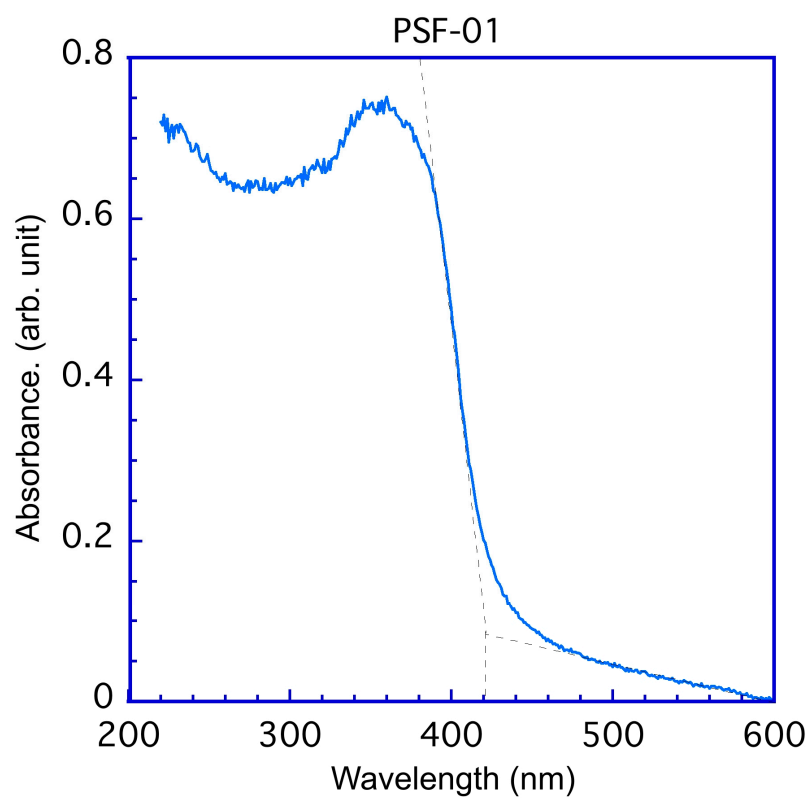

Figure S3. UV Vis spectrum of PFS-01 material

Table S1. Reaction rate constant followed pseudo-first-order kinetics

| Environmental factors                               | k               | T <sub>1/2</sub> | R <sup>2</sup> |
|-----------------------------------------------------|-----------------|------------------|----------------|
| pH 2                                                | 0.0283 ± 0.0015 | 24.4928          | 0.9543         |
| pH 7                                                | 0.0109 ± 0.0044 | 63.5918          | 0.9771         |
| pH 10                                               | 0.0101 ± 0.0015 | 68.6283          | 0.9891         |
| pH 13                                               | 0.0022 ± 0.0015 | 315.0669         | 0.9973         |
| 50 mg.L <sup>-1</sup> Cl <sup>-</sup>               | 0.0063 ± 0.0035 | 110.0234         | 0.9917         |
| 50 mg.L <sup>-1</sup> HCO <sub>3</sub> <sup>-</sup> | 0.0023 ± 0.0005 | 301.3683         | 0.9896         |
| 50 mg.L <sup>-1</sup> NO <sub>3</sub> <sup>-</sup>  | 0.0131 ± 0.0023 | 52.9120          | 0.9794         |
| 50 mg.L <sup>-1</sup> CO <sub>3</sub> <sup>2-</sup> | 0.0012 ± 0.0006 | 577.6227         | 0.9621         |
| 50 mg.L <sup>-1</sup> HA                            | 0.0044 ± 0.001  | 157.5335         | 0.9955         |
| Tap water                                           | 0.0082 ± 0.0017 | 84.5301          | 0.9853         |
| River                                               | 0.0052 ± 0.0009 | 133.2975         | 0.9911         |
| Lake                                                | 0.0044 ± 0.0002 | 157.5335         | 0.9923         |
| Sea                                                 | 0.0079 ± 0.0004 | 87.7401          | 0.9595         |
| (Ca + Mg) water                                     | 0.0093 ± 0.0012 | 74.5319          | 0.9843         |
